# Supplementary material
Source: PubMed Central journal article supplement (PMC4215595)
Supplement: ejn0040-2502-sd1.pdf [file ejn0040-2502-sd1.pdf]

Supplement 1

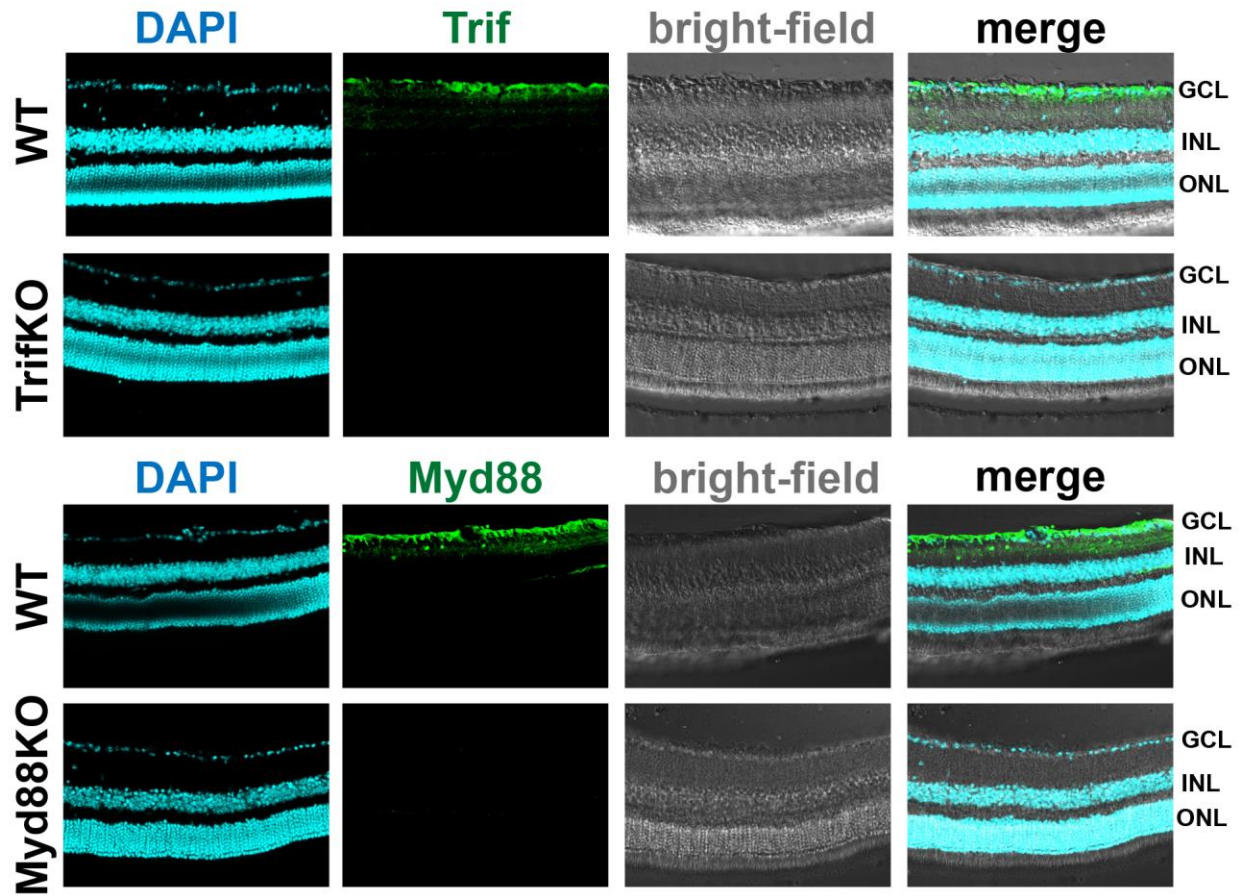

**Figure S:** Immunohistochemistry performed on retinal sections from wild type (WT), Trif and Myd88 knockout mice (TrifKO and Myd88KO) demonstrated specificity of anti-Trif and anti-Myd88 antibodies.
